# Supplementary material for: Robust, sensitive, and quantitative single-cell proteomics based on ion mobility filtering
Source: bioRxiv or medRxiv preprint supplement (doi:10.1101/2021.01.30.428333), 2021-12-15
Supplement: Supplementary file [file media-1.pdf]

## **Supplementary Information for**

# **Robust, sensitive, and quantitative single-cell proteomics based on ion mobility filtering**

Woo et al.

Supplementary Materials

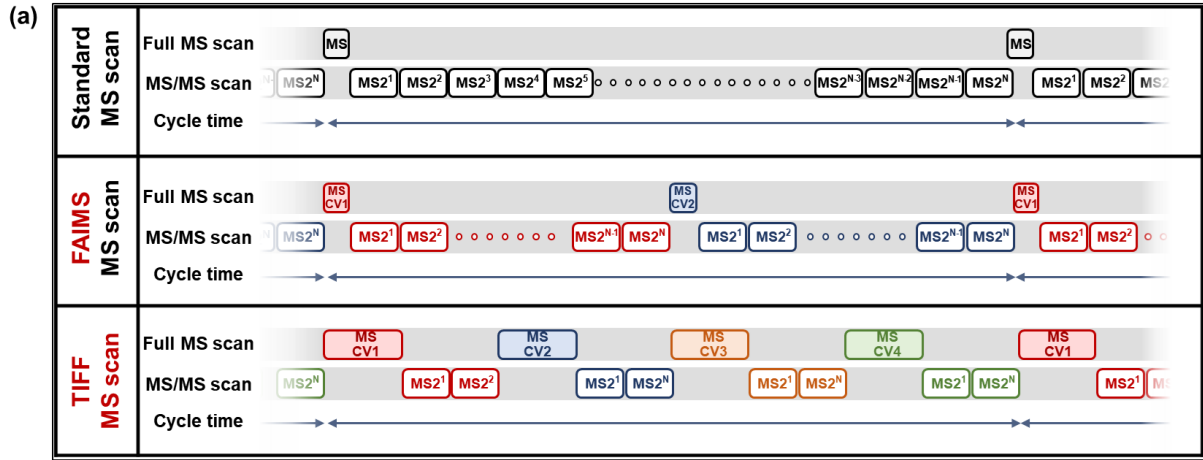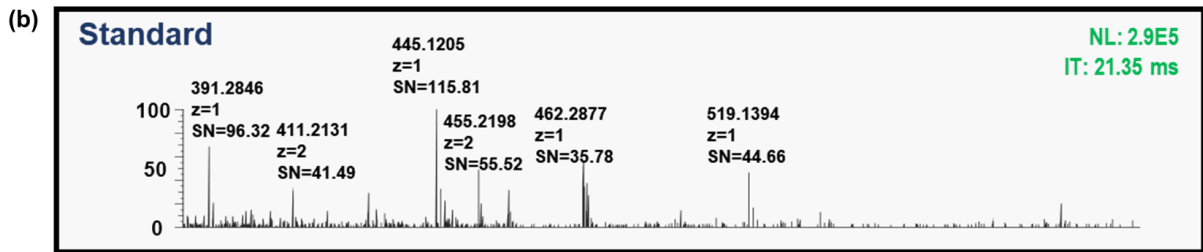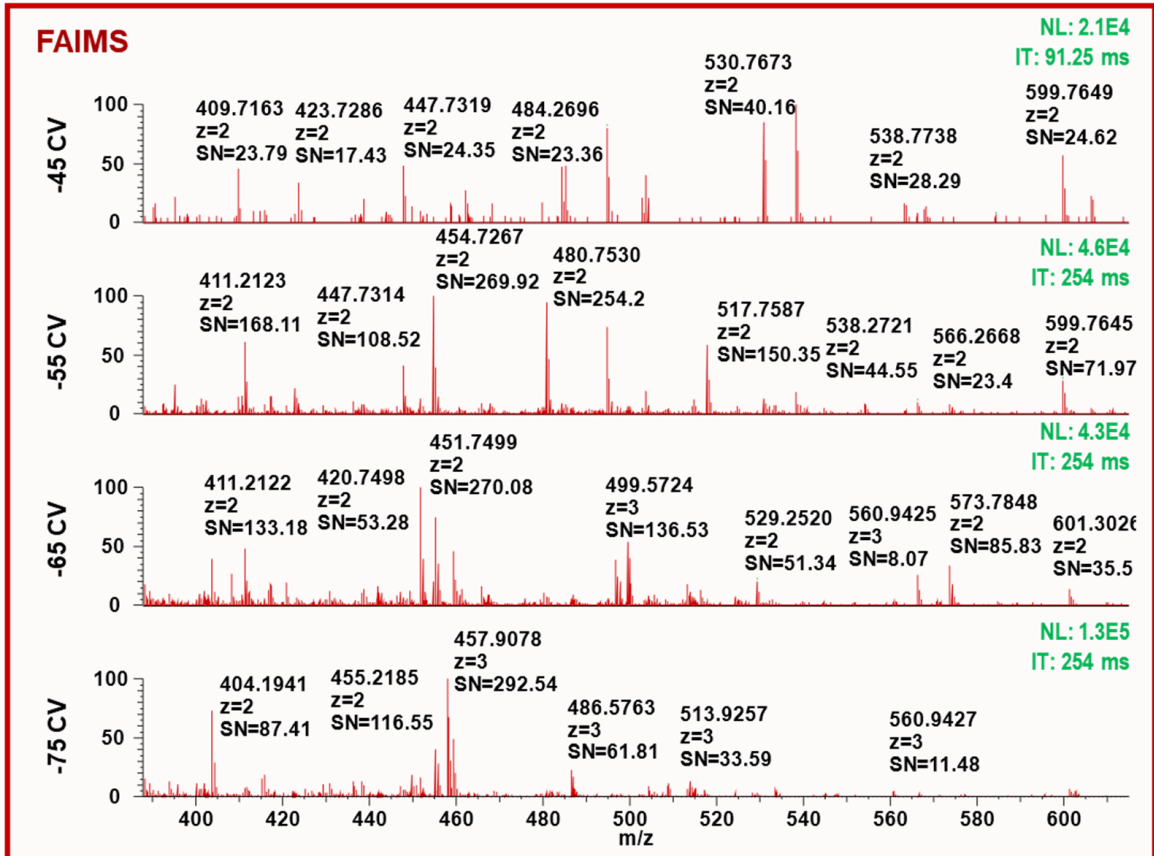

**Supplementary Figure 1. (a)** Schematic illustration of three different MS acquisition methods. (Upper) standard MS method without FAIMS; (Middle) standard FAIMS-MS method; (Bottom) The transferring identification based on FAIMS filtering (TIFF) method. In the TIFF method, the elongated ion accumulations for MS1 scan will increase the sensitivity of MS1-level peptide detection. The peptide features are identified by matching to a spectral library based on 3D tags (LC retention time, accurate m/z, and FAIMS CV). Small number of MS/MS scans are used for non-linear alignment during MaxQuant search. **(b)** Representative spectra are chosen from the RAW files of a standard method (in the blue box) and a FAIMS method with 4 CVs (in the red box). The spectra are extracted from a similar retention time. Spectra are labeled with m/z, ion charge state, and signal to noise (SN) value.

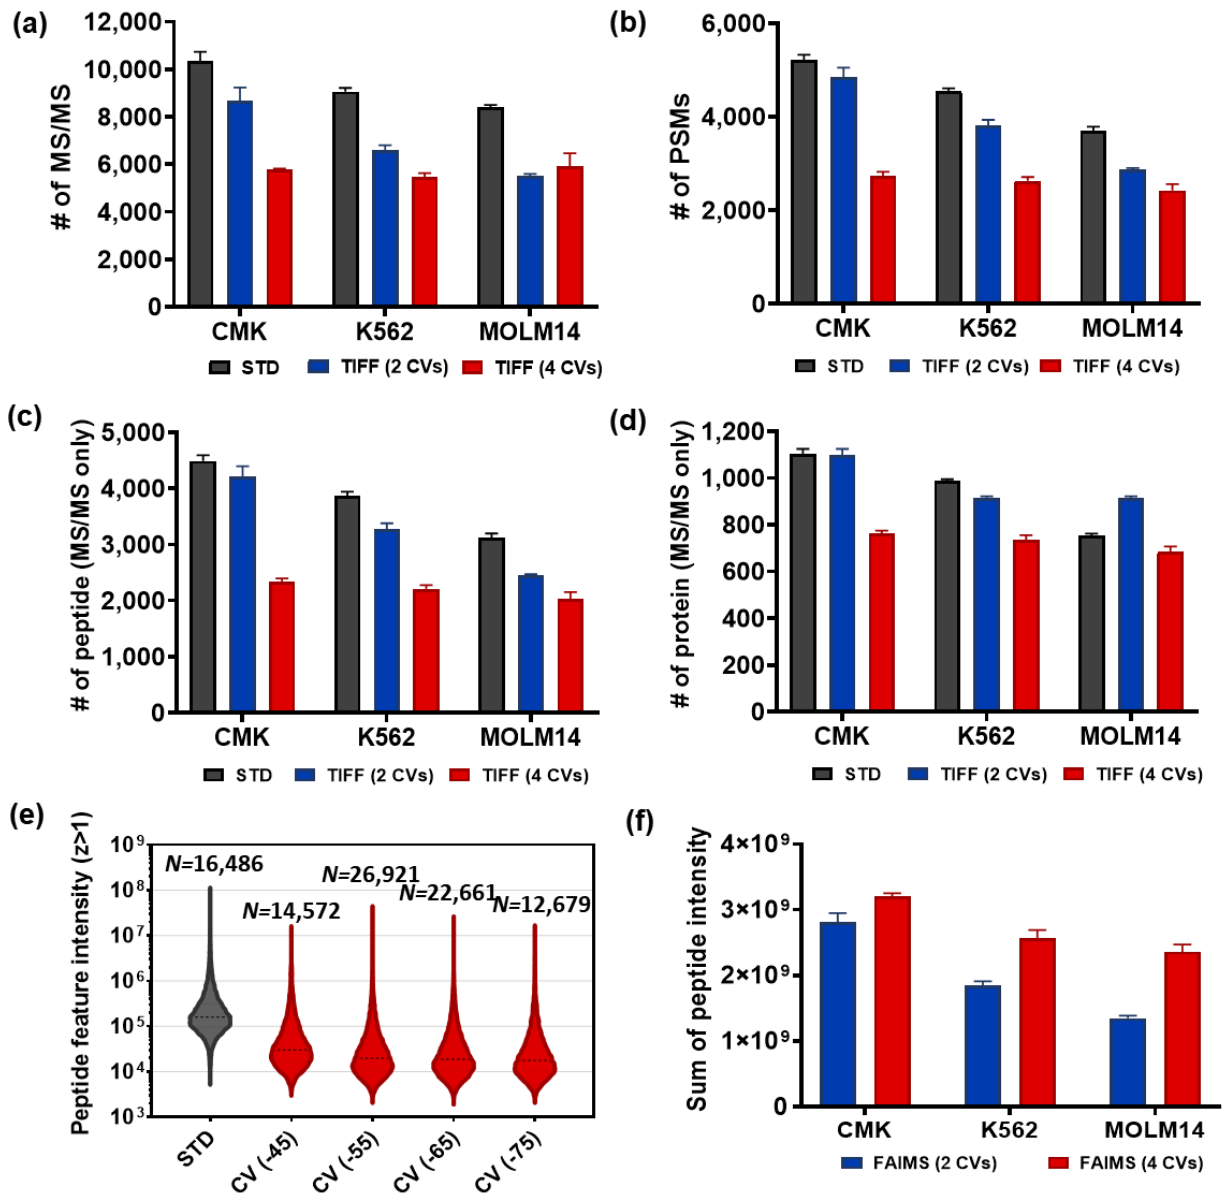

**Supplementary Figure 2. (a-d)** Benchmarking of the standard, 2-CV-TIFF, and 4-CV TIFF methods using single-cell level peptides (0.2 ng) from three cell lines (CMK, K562, and MOLN14). **(a)** The numbers of MS/MS events, **(b)** peptide spectrum matches (PSM), **(c)** unique peptides and **(d)** proteins identified by MS/MS. **(e)** Intensity distributions of peptide features ( $z > +1$ ) obtained by the standard and 4-CV-TIFF methods using 0.2-ng CMK peptides. Labeled numbers indicate the numbers of detected peptide features. An in-house MASIC tool was used to select the peptide features from MSGF+ results. **(f)** The

summed peptide intensities from the 2-CV and 4-CV TIFF methods. All the error bar on the graph include triplicate of the sample.

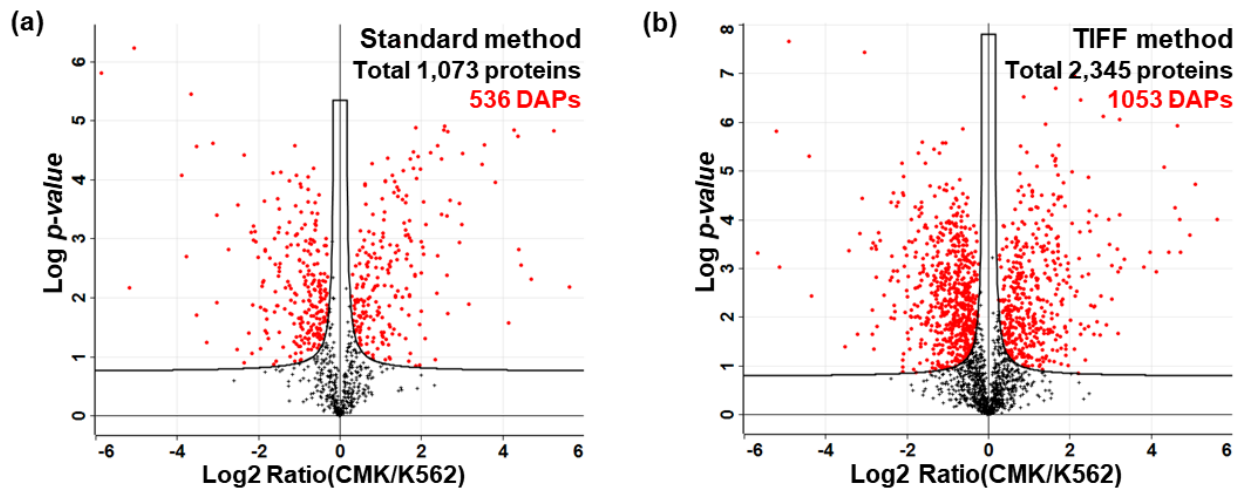

**Supplementary Figure 3. (a-b)** Statistics analysis to identify differentially abundant proteins (DAPs) between CMK and K562 cells using iBAQ intensities (t-test FDR < 0.05 and  $S_0 = 0.1$ ). Volcano plots for **(a)** standard method and **(b)** the 4-CV TIFF method. Total quantified proteins and DAPs were labeled with red color.

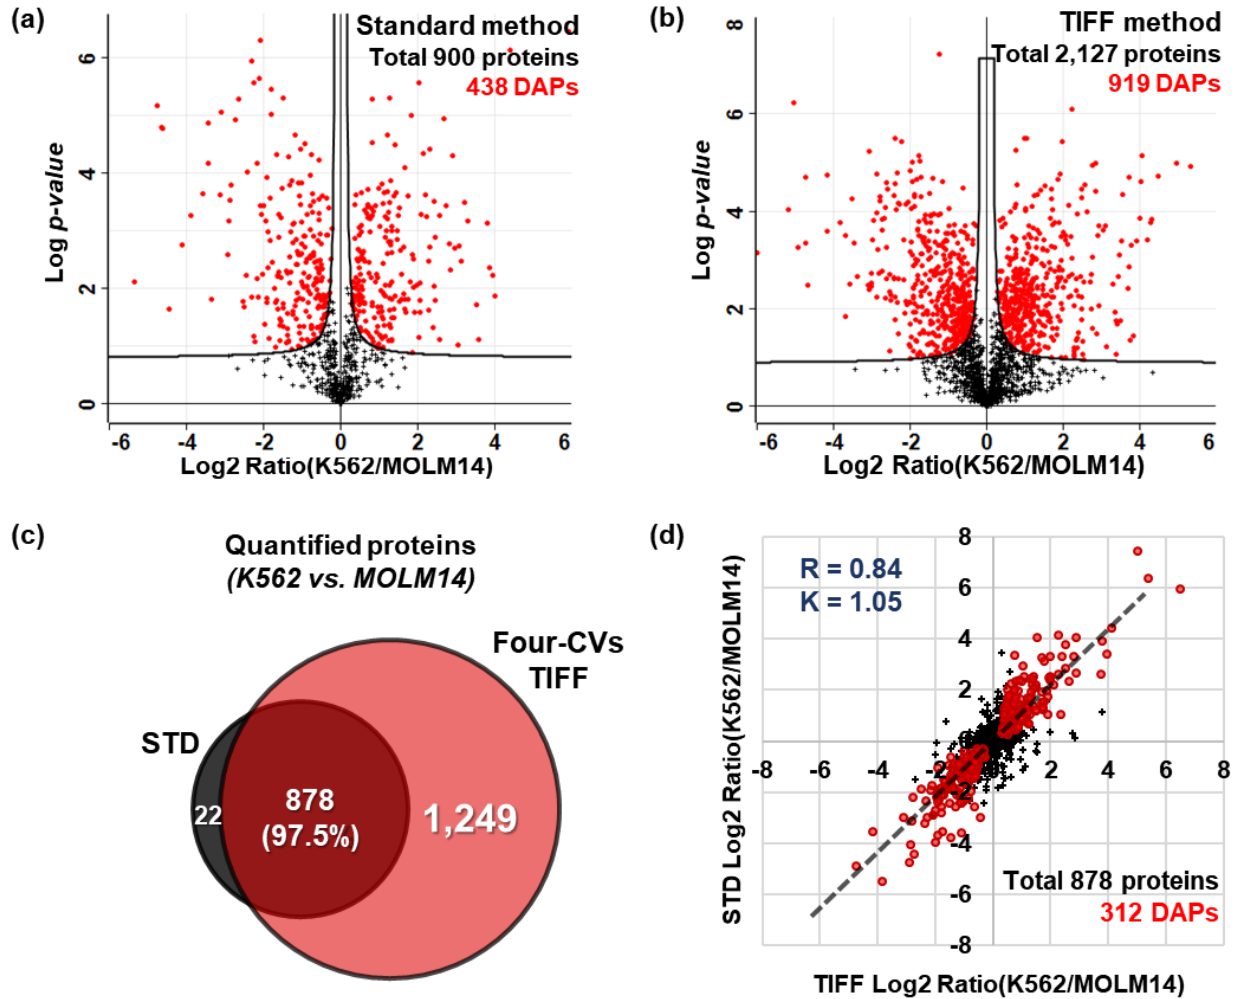

**Supplementary Figure 4.** (a-b) Statistics analysis to identify differentially abundant proteins (DAPs) between K562 and MOLM14 cells (t-test FDR < 0.05 and  $S_0 = 0.1$ ). Volcano plots for (a) the standard and (b) 4-CV TIFF methods. (c) Overlap of quantifiable proteins between K562 and MOLM14 cells measured by standard and TIFF methods (4 CVs). (d) The linear correlation and slope of log<sub>2</sub> transformed fold changes of K562 and MOLM14 proteins between the 4-CV TIFF and STD methods. Red dots indicate DAPs in both methods calculated by t-test (FDR<0.05,  $S_0=0.1$ ).

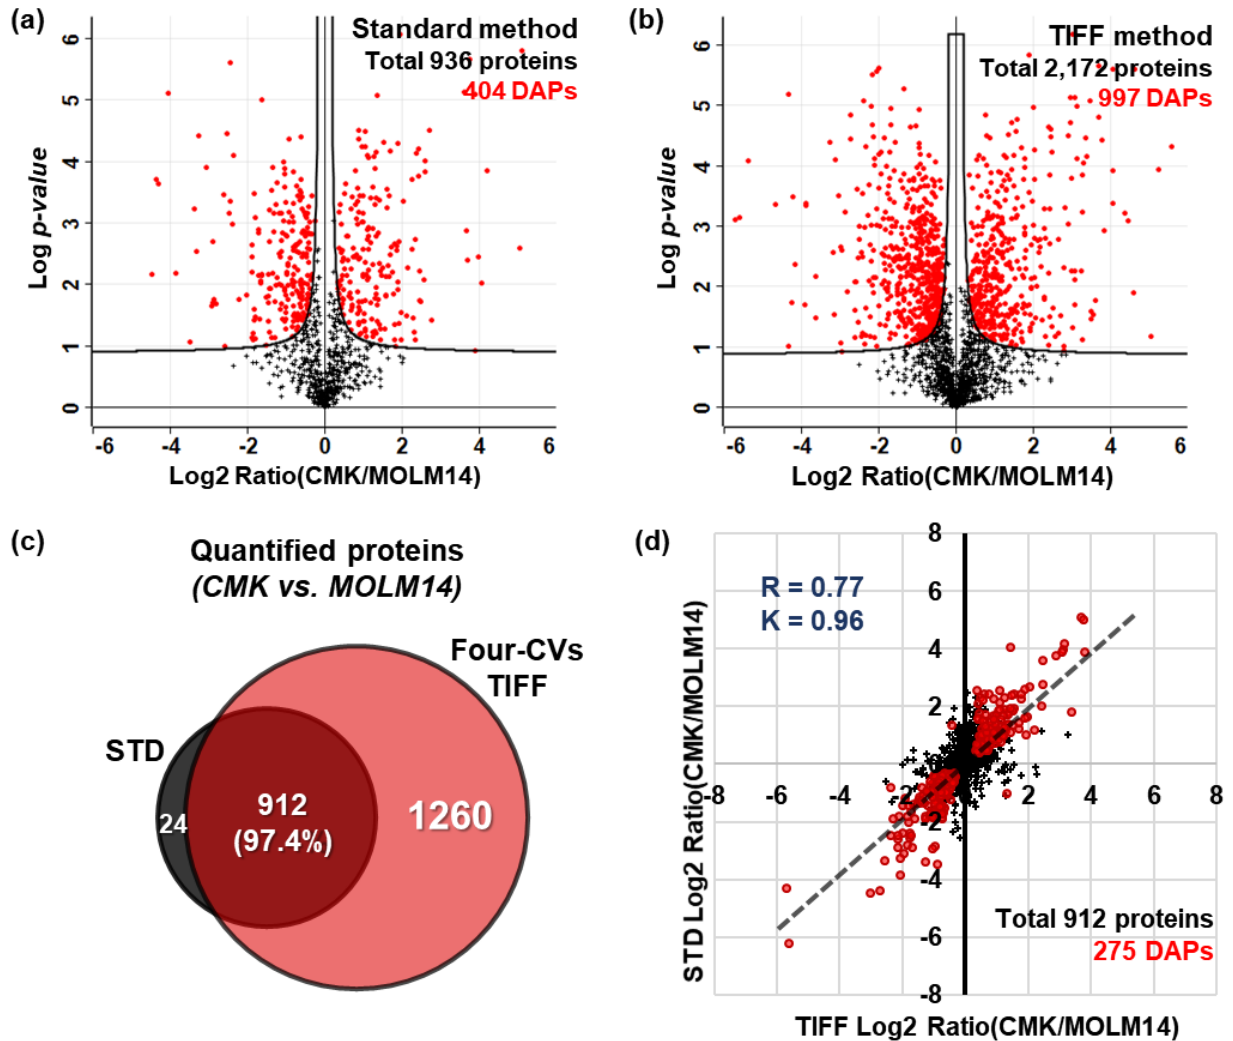

**Supplementary Figure 5. (a-b)** Statistics analysis to identify differentially abundant proteins (DAPs) between CMK and MOLM14 cells (t-test FDR < 0.05 and  $S_0 = 0.1$ ). Volcano plots for **(a)** the standard and **(b)** 4-CV TIFF methods. **(c)** Overlap of quantifiable proteins between CMK and MOLM14 cells measured by the standard and 4-CV TIFF methods. **(d)** The linear correlation of log<sub>2</sub>-transformed fold changes of CMK and MOLM14 proteins between the 4-CV TIFF and STD methods. Red dots indicate (DAPs) calculated by t-test (FDR<0.05,  $S_0=0.1$ ).



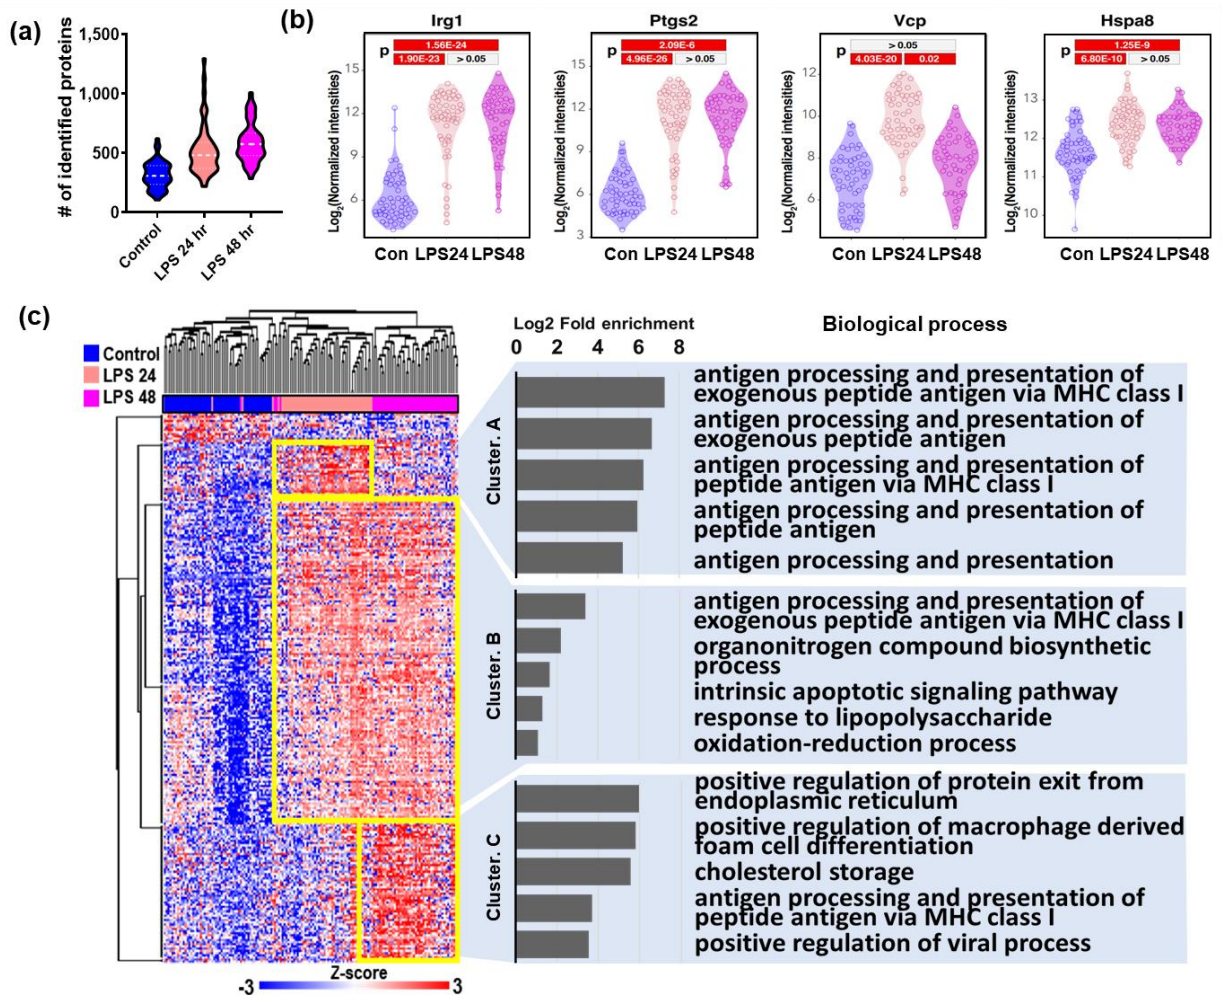

**Supplementary Figure 6. (a)** The numbers of identified proteins in single macrophage cells at different conditions. The median values of each condition were marked with a white dotted line in violin plots. **(b)** Abundance distributions of representative regulated proteins from different treatment conditions. **(c)** Heatmap showing the protein abundance differences across the 155 macrophage cells after statistical test using ANOVA (FDR < 0.001,  $S_0 = 5$ ). The hierarchical clustering was performed using the Euclidean method with 6 number of clusters for 250 DAPs by ANOVA test. Proteins in cluster A to C were applied to enrichment analysis using DAVID bioinformatics tools.

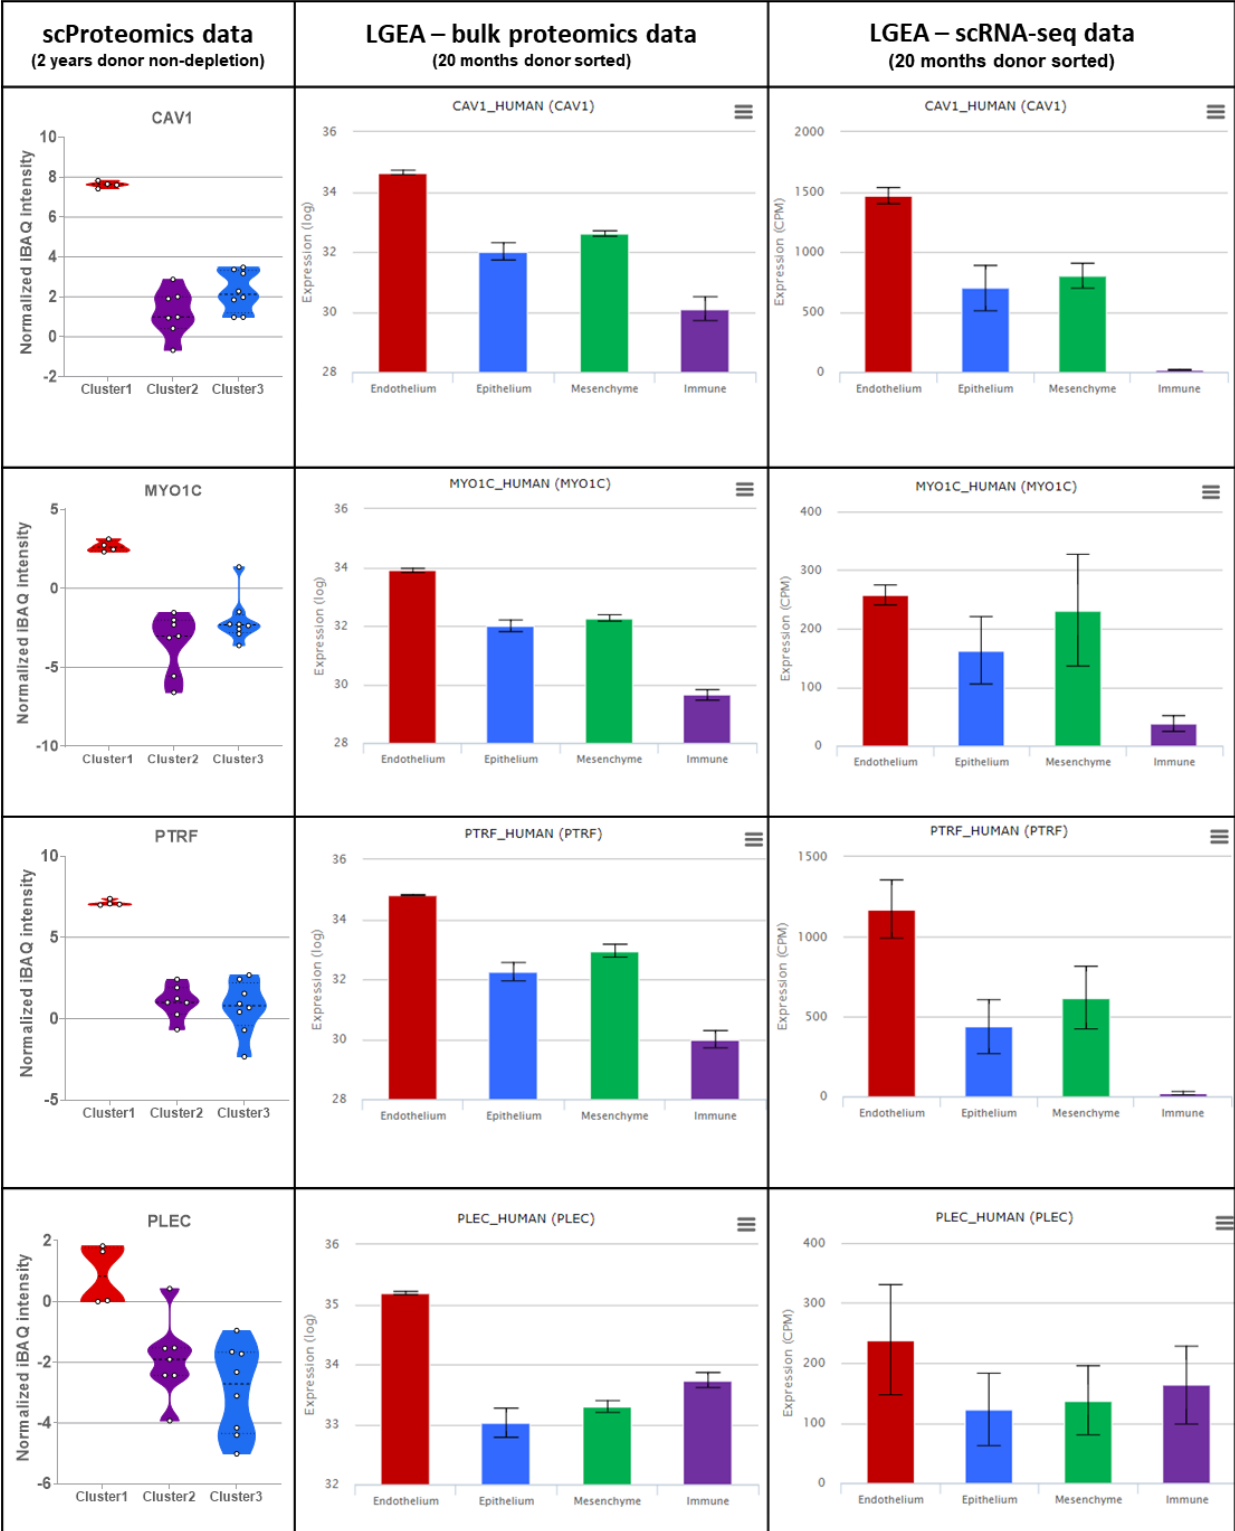

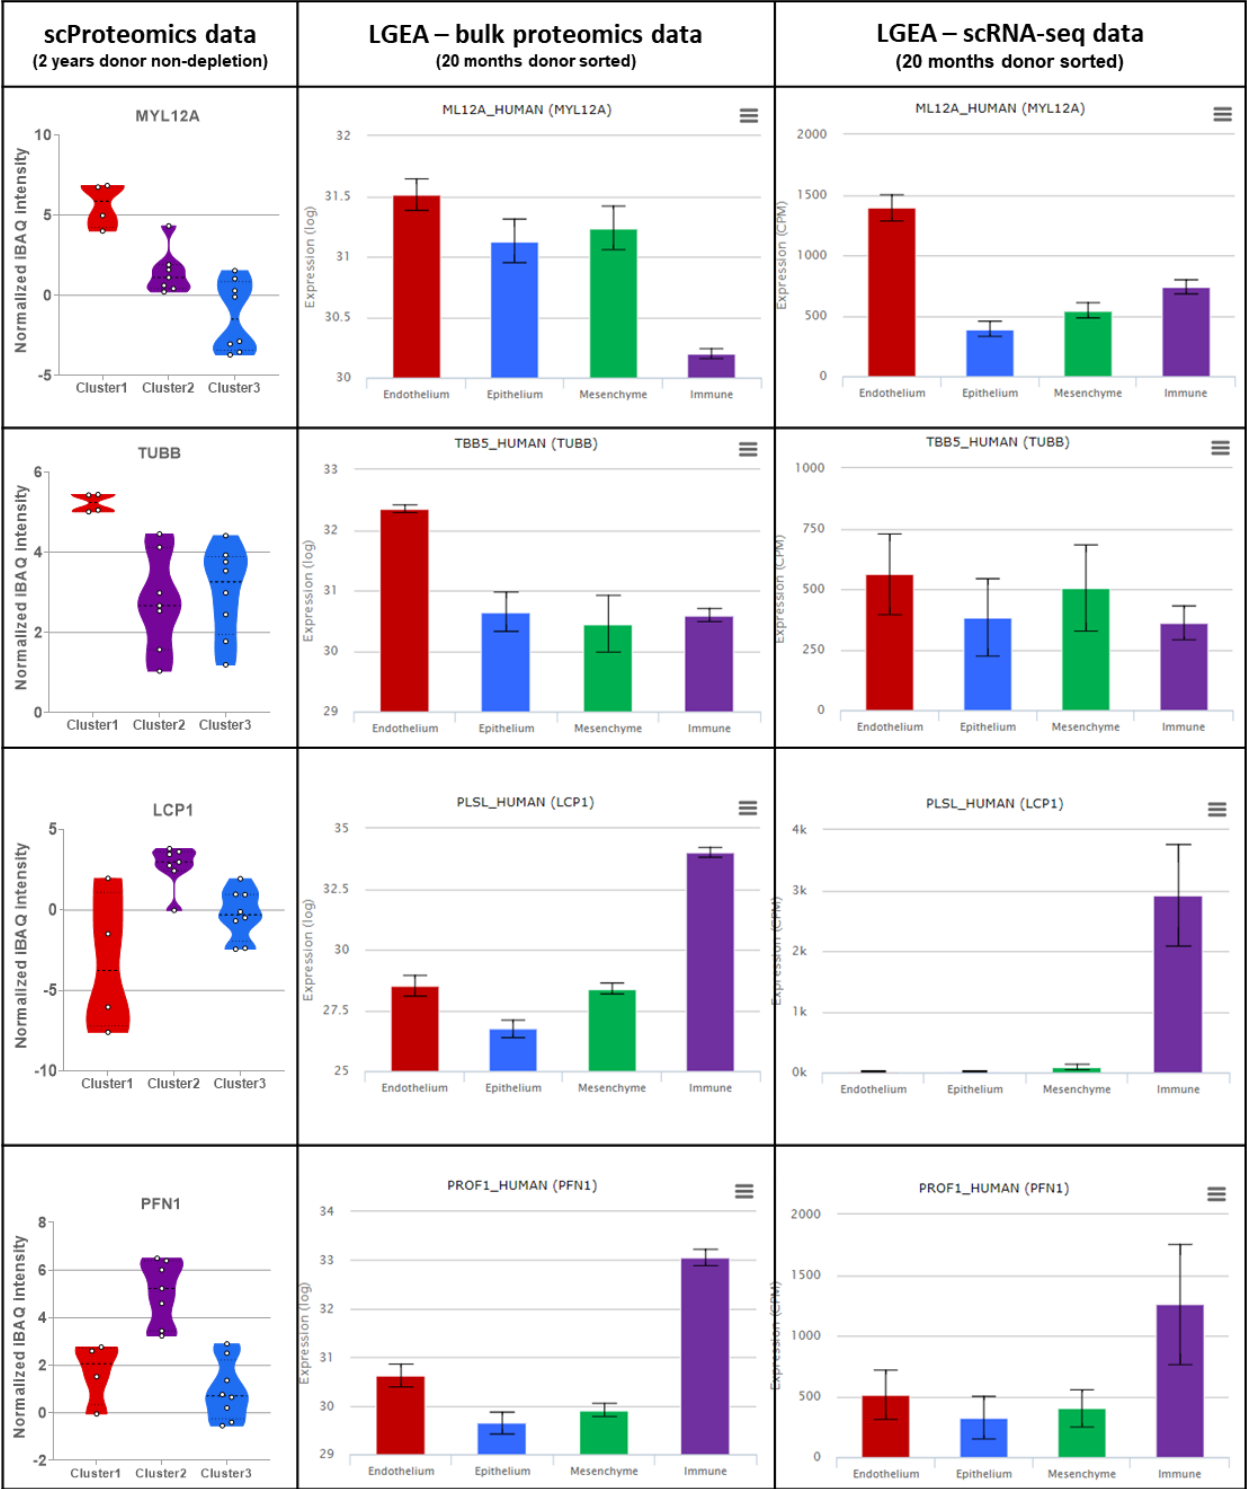

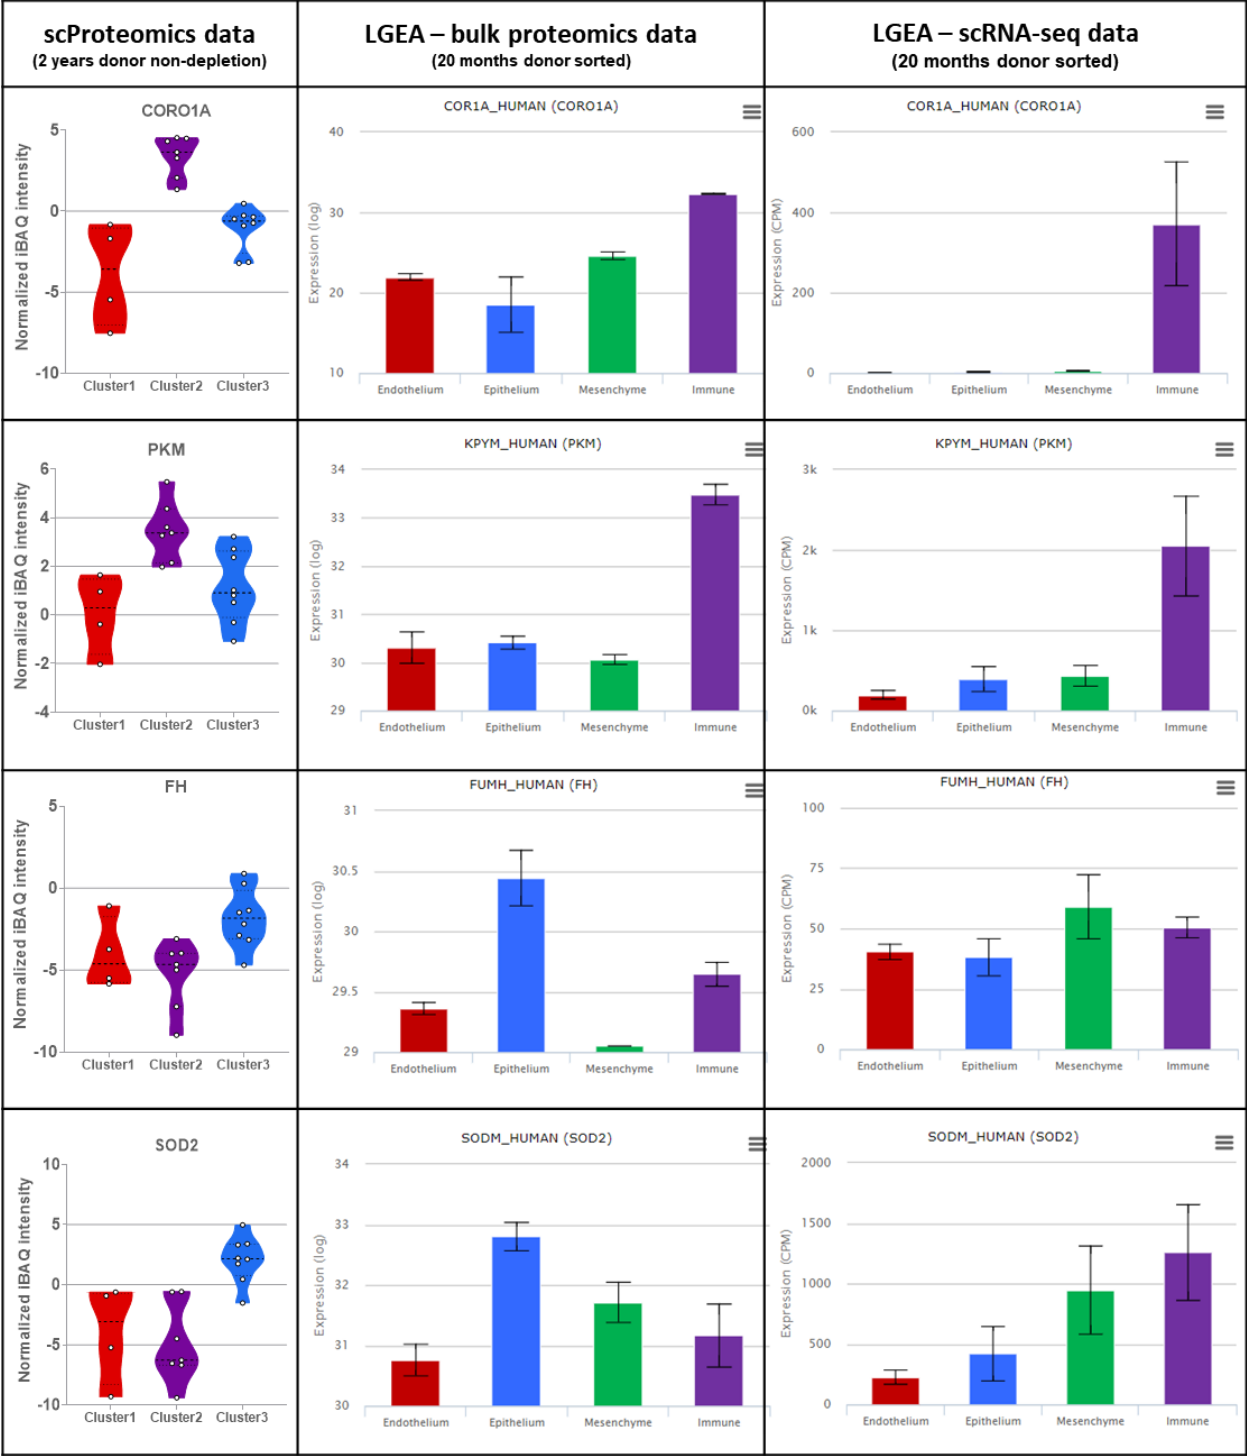

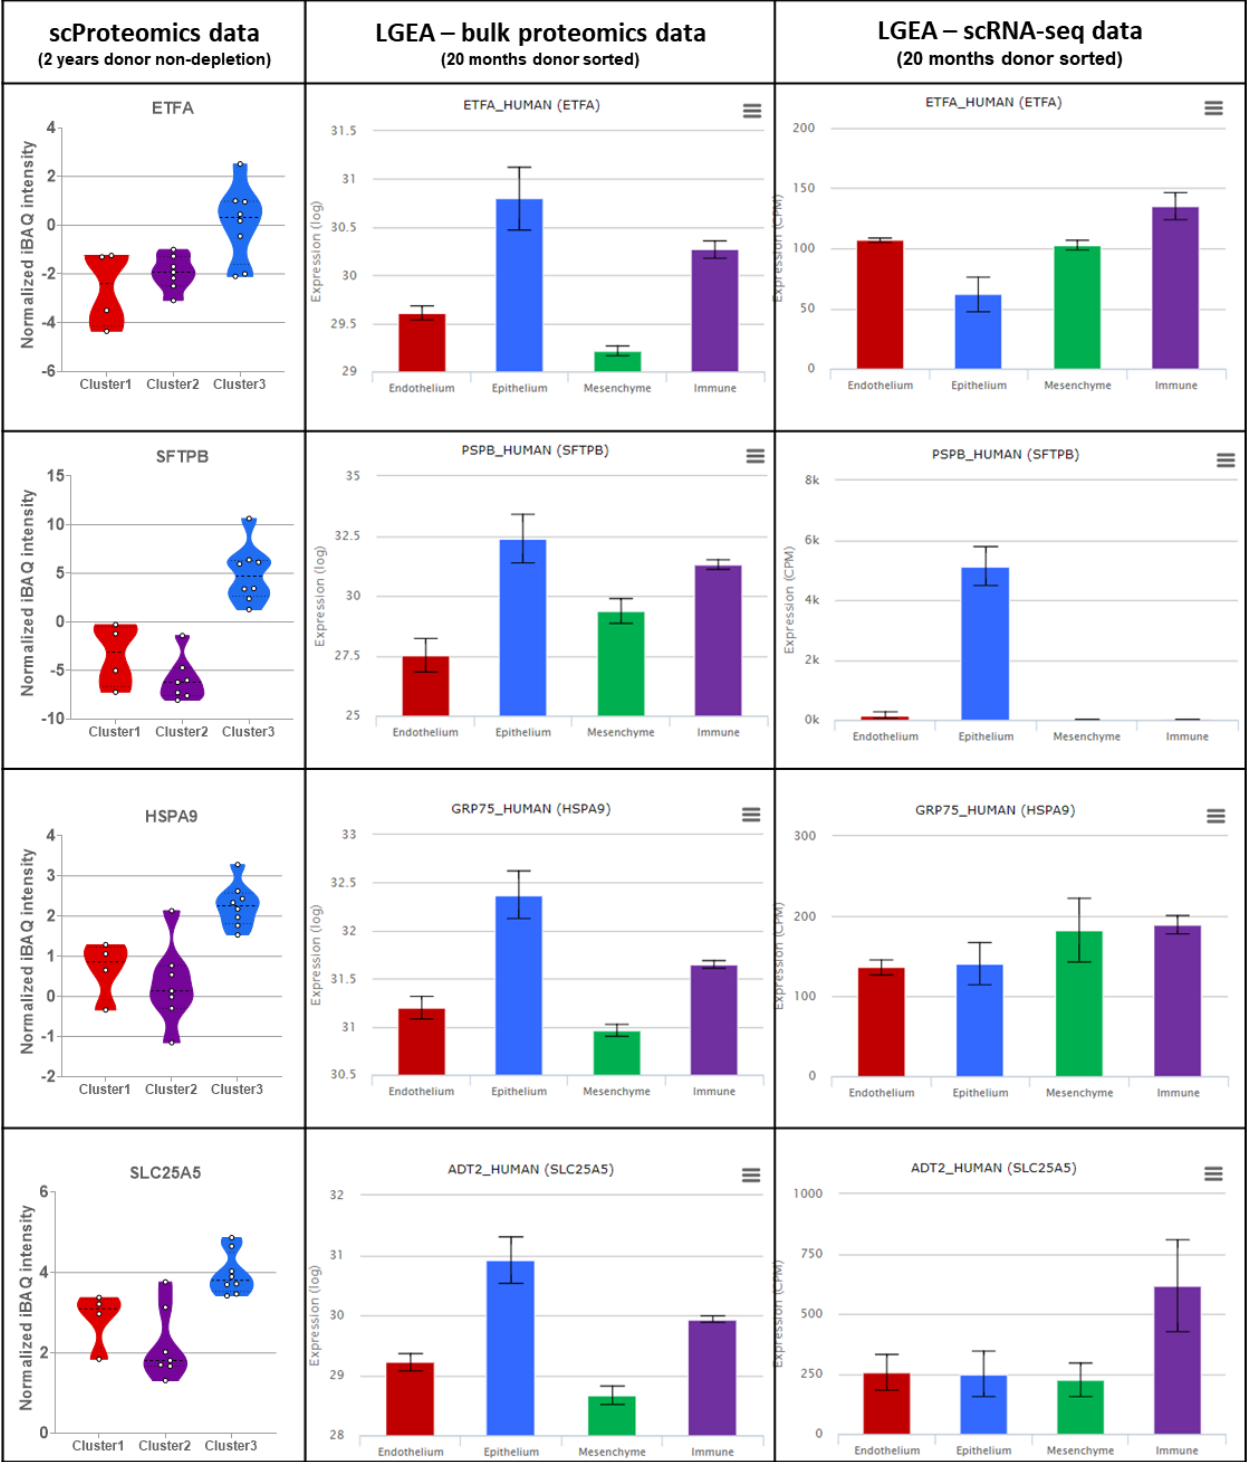

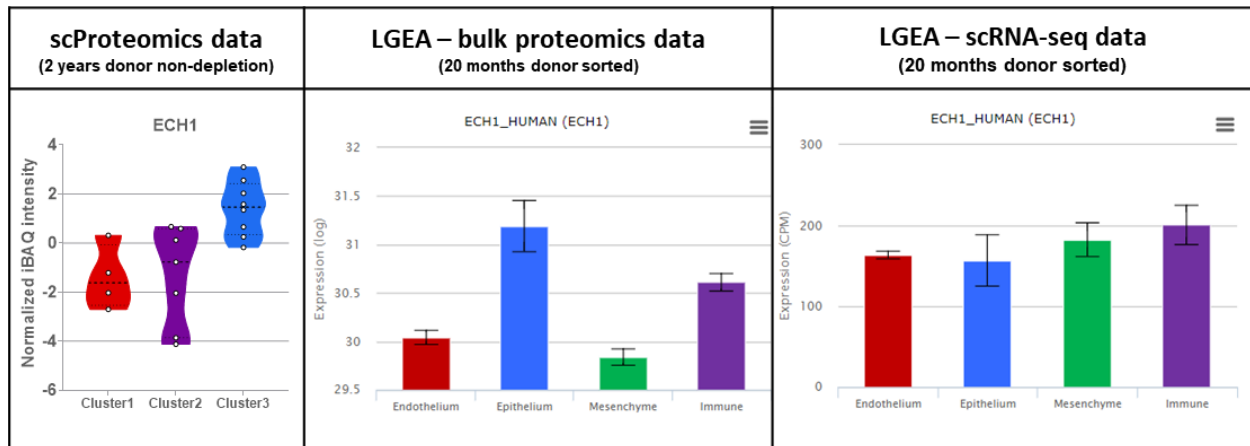

**Supplementary Figure 7.** The abundance distributions of representative proteins markers in the scProteomics data and lung gene expression analysis (LGEA) database (<https://research.cchmc.org/pbge/lunggens/mainportal.html>) containing sorted human lung endothelial, epithelial, immune and mesenchymal cells measured by bulk proteomics and single-cell RNA sequencing

| Single-cell approach         | LC system                                            |  | MS instrument | Cell Type | Protein Groups (by MS/MS)    | Proteins Groups (MBR) | Reference                                                     |
|------------------------------|------------------------------------------------------|--|---------------|-----------|------------------------------|-----------------------|---------------------------------------------------------------|
|                              | (column I.D. in $\mu\text{m}$ , flow rate in nL/min) |  |               |           |                              |                       |                                                               |
| nanoPOTS                     | 30 / 50                                              |  | Lumos         | HeLa      | 211                          | 669                   | Zhu et. al, <i>Angew chem</i> , 2018 <sup>2</sup>             |
| nanoPOTS with autosampler    | 50 / 150                                             |  | Lumos         | MCF10     | 250                          | 773                   | Sarah et. al. <i>Analytical Chemistry</i> , 2020 <sup>3</sup> |
| nanoPOTS with narrow-bore LC | 20 / 20                                              |  | Eclipse       | HeLa      | 362                          | 874                   | Cong et. al. <i>Analytical Chemistry</i> , 2020 <sup>4</sup>  |
| nanoPOTS with FAIMS          | 20 / 20                                              |  | Eclipse       | HeLa      | 683 (By MQ)/<br>1056 (By PD) | 1475                  | Cong et. Al. <i>bioRxiv</i> , 2020 <sup>5</sup>               |
| nanoPOTS with TIFF           | 50 / 100                                             |  | Lumos         | HeLa      | 209                          | 1212                  | <i>This study</i>                                             |

**Supplementary Table 1.** Numbers of identified proteins in single mammalian cells from previously published papers.

Proteins were identified by MS/MS or by matching between runs (MBR) algorithm in Maxquant software <sup>6</sup> (MQ: MaxQuant, PD: Proteome Discoverer).

## Supplementary references

1. Du, Y. et al. Integration of transcriptomic and proteomic data identifies biological functions in cell populations from human infant lung. *Am J Physiol Lung Cell Mol Physiol* **317**, L347-L360 (2019).
2. Zhu, Y. et al. Proteomic Analysis of Single Mammalian Cells Enabled by Microfluidic Nanodroplet Sample Preparation and Ultrasensitive NanoLC-MS. *Angew Chem Int Ed Engl* **57**, 12370-12374 (2018).
3. Williams, S.M. et al. Automated Coupling of Nanodroplet Sample Preparation with Liquid Chromatography-Mass Spectrometry for High-Throughput Single-Cell Proteomics. *Anal Chem* (2020).
4. Cong, Y. et al. Improved Single-Cell Proteome Coverage Using Narrow-Bore Packed NanoLC Columns and Ultrasensitive Mass Spectrometry. *Anal Chem* **92**, 2665-2671 (2020).
5. Cong, Y. et al. Ultrasensitive single-cell proteomics workflow identifies >1000 protein groups per mammalian cell. *bioRxiv*, 132449 (2020).
6. Tyanova, S., Temu, T. & Cox, J. The MaxQuant computational platform for mass spectrometry-based shotgun proteomics. *Nat Protoc* **11**, 2301-2319 (2016).
